# Supplementary material
Source: PubMed Central journal article supplement (PMC7324093)
Supplement: mmc1.pdf [file mmc1.pdf]

# THE LANCET

## Gastroenterology & Hepatology

### Supplementary appendix

This appendix formed part of the original submission and has been peer reviewed.  
We post it as supplied by the authors.

Supplement to: Eshraghian A, Taghavi A, Nikeghbalian S, Malek-Hosseini SA.  
Reduced rate of hospital admissions for liver-related morbidities during the initial  
COVID-19 outbreak. *Lancet Gastroenterol Hepatol* 2020; published online June 29.  
[https://doi.org/10.1016/S2468-1253\(20\)30207-7](https://doi.org/10.1016/S2468-1253(20)30207-7).

**Supplement Table 1:** Baseline characteristics of patients

|                                  | <b>Study period</b> | <b>Control time period</b> | <b>P-value</b> |
|----------------------------------|---------------------|----------------------------|----------------|
| <b>Age (years)</b>               | 51.3 ± 14.9         | 50.7 ± 13.8                | 0.679          |
| <b>Sex (male/female)</b>         | 56/68               | 113/117                    | 0.476          |
| <b>MELD score</b>                | 17.07 ± 4.05        | 15.18 ± 3.45               | <0.001         |
| <b>Hospital stay (days)</b>      | 7.44 ± 5.42         | 5.32 ± 3.37                | <0.001         |
| <b>Causes of liver cirrhosis</b> |                     |                            | >0.05          |
| <b>HBV</b>                       | 15                  | 34                         |                |
| <b>NASH</b>                      | 14                  | 35                         |                |
| <b>Cryptogenic</b>               | 14                  | 29                         |                |
| <b>PSC</b>                       | 12                  | 24                         |                |
| <b>AIH</b>                       | 10                  | 18                         |                |
| <b>HCV</b>                       | 10                  | 16                         |                |
| <b>Budd-Chiari syndrome</b>      | 6                   | 9                          |                |
| <b>Wilson disease</b>            | 1                   | 2                          |                |

MELD: Model for end stage liver disease; HBV: Hepatitis B virus; NASH: Non-alcoholic steatohepatitis; PSC: Primary sclerosing cholangitis; AIH: Autoimmune hepatitis; HCV: Hepatitis C virus

**Supplementary Table 2:** Hospital admissions for liver related disorders during COVID-19 outbreak compared to the control time

|                                            | <b>Study period</b> | <b>Control time</b> | <b>Incidence rate ratio (95% CI)</b> | <b>P-value</b> |
|--------------------------------------------|---------------------|---------------------|--------------------------------------|----------------|
| <b>All admissions</b>                      |                     |                     |                                      | <0.001         |
| <b>Number of admissions (rate per day)</b> | 124 (1.74)          | 230 (3.23)          | 1.85 (1.49- 2.30)                    |                |
| <b>GIB</b>                                 |                     |                     |                                      | 0.004          |
| <b>Number of admissions (rate per day)</b> | 14 (0.19)           | 35 (0.49)           | 2.50 (1.34- 4.64)                    |                |
| <b>SBP</b>                                 |                     |                     |                                      | 0.042          |
| <b>Number of admissions (rate per day)</b> | 19 (0.26)           | 34 (0.47)           | 1.78 (1.02- 3.13)                    |                |
| <b>Hepatorenal syndrome</b>                |                     |                     |                                      | 0.009          |
| <b>Number of admissions (rate per day)</b> | 23 (0.32)           | 45 (0.63)           | 1.95 (1.18- 3.23)                    |                |
| <b>Hepatic Encephalopathy</b>              |                     |                     |                                      | 0.018          |
| <b>Number of admissions (rate per day)</b> | 19 (0.26)           | 37 (0.52)           | 1.94 (1.12- 3.38)                    |                |
| <b>Acute hepatitis</b>                     |                     |                     |                                      | 0.082          |
| <b>Number of admissions (rate per day)</b> | 6 (0.08)            | 14 (0.19)           | 2.33 (0.89- 6.07)                    |                |
| <b>Diuretic resistant ascites</b>          |                     |                     |                                      | 0.068          |
| <b>Number of admissions (rate per day)</b> | 7 (0.09)            | 16 (0.22)           | 2.28 (0.94- 5.55)                    |                |
| <b>Liver transplant related admissions</b> |                     |                     |                                      | 0.160          |
| <b>Number of admissions (rate per day)</b> | 36 (0.50)           | 49 (0.69)           | 1.36 (0.88- 2.09)                    |                |

GIB: Gastrointestinal bleeding; SBP: Spontaneous bacterial peritonitis; CI: Confidence interval. Poisson regression analysis was used to calculate incidence rate ratios comparing admissions during COVID-19 outbreak with the control time period.
